# Supplementary material
Source: publisher figshare collection journal article supplement (https://acs.figshare.com/ndownloader/files/5098510)

# **A Comparatively Advantageous Route to Oxcarbazepine (Trileptal®) Based on Palladium-Catalyzed Arylations Free of Transmetallating Agents**

Mónica Carril, Raul SanMartin\*, Fátima Churruca, Imanol Tellitu and Esther Domínguez\*

## **Supporting Information**

|                                                                                        |            |
|----------------------------------------------------------------------------------------|------------|
| <b>Experimental section</b>                                                            | <b>S2</b>  |
| <b>General Remarks</b>                                                                 | <b>S2</b>  |
| <b>1-[2-<i>N</i>-(4-Methylbenzenesulfonamido)phenyl]ethanone 6a</b>                    | <b>S3</b>  |
| <b>2-(2-Bromophenyl)-1-[2-<i>N</i>-(4-methylbenzenesulfonamido)phenyl]ethanone 7a.</b> | <b>S3</b>  |
| <b>1-(2-Aminophenyl)-2-(2-bromophenyl)ethanone 5</b>                                   | <b>S4</b>  |
| <b>10,11-Dihydro-5<i>H</i>-dibenz[<i>b,f</i>]azepin-10-one 8</b>                       | <b>S5</b>  |
| <b>10,11-Dihydro-5-aminocarbonyl-dibenz[<i>b,f</i>]azepin-10-one (oxcarbazepine) 1</b> | <b>S5</b>  |
| <b><sup>1</sup>H- and <sup>13</sup>C-NMR spectra of compounds 6a, 7a, 5, 8 and 1</b>   | <b>S7</b>  |
| <b><sup>1</sup>H- NMR spectrum of 6a</b>                                               | <b>S7</b>  |
| <b><sup>13</sup>C-NMR spectrum of 6a</b>                                               | <b>S8</b>  |
| <b><sup>1</sup>H- NMR spectrum of 7a</b>                                               | <b>S9</b>  |
| <b><sup>13</sup>C-NMR spectrum of 7a</b>                                               | <b>S10</b> |
| <b><sup>1</sup>H- NMR spectrum of 5</b>                                                | <b>S11</b> |
| <b><sup>13</sup>C-NMR spectrum of 5</b>                                                | <b>S12</b> |
| <b><sup>1</sup>H- NMR spectrum of 8</b>                                                | <b>S13</b> |
| <b><sup>13</sup>C-NMR spectrum of 8</b>                                                | <b>S14</b> |
| <b><sup>1</sup>H- NMR spectrum of 1</b>                                                | <b>S15</b> |
| <b><sup>13</sup>C-NMR spectrum of 1</b>                                                | <b>S16</b> |

**General Remarks.** Toluene, dichloromethane, pyridine and chloroform were purchased from Scharlau Chemie and used without further purification. 2'-Aminoacetophenone, *p*-toluenesulfonyl chloride, potassium carbonate, methyl chloroformate, Xantphos and potassium phosphate were purchased from Aldrich and used without further purification. 1,2-Dibromobenzene, Pd(OAc)<sub>2</sub>, cesium carbonate, chlorosulfonyl isocyanate were purchased from Acros Organics and used as received. BINAP was purchased from Avocado Organics and used without further purification. Concentrated sulfuric acid was purchased from NormaSolv and used as received. Redistilled water was employed in several palladium-catalyzed reactions, although non-distilled water afforded target compounds with comparable yields.

<sup>1</sup>H and <sup>13</sup>C spectra were recorded in CDCl<sub>3</sub> solution in a Bruker AC-250. Chemical shifts are reported in ppm downfield (δ) from Me<sub>4</sub>Si. IR spectra were recorded on a Perkin-Elmer 1600 FT infrared spectrophotometer and only noteworthy absorptions are listed. Melting points were determined in a capillary tube and are uncorrected. TLC was carried out on SiO<sub>2</sub> (silica gel 60 F<sub>254</sub>, Merck), and the spots were located with UV light. Flash chromatography was carried out on SiO<sub>2</sub> (silica gel 60, Merck, 230-400 mesh ASTM). Drying of organic extracts during workup of reactions was performed over anhydrous Na<sub>2</sub>SO<sub>4</sub>. Evaporation of solvents was accomplished with a Büchi rotatory evaporator. HRMS were performed by the *Centro de Apoio Científico Tecnológico á Investigación* (C.A.C.T.I.) in the University of Vigo, using VG Autospec M apparatus..

All reactions were carried out under argon except the synthesis of amine **5** which was performed in a reaction vessel open to the atmosphere.

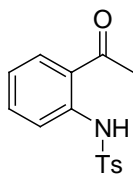

### 1-[2-*N*-(4-Methylbenzenesulfonamido)phenyl]ethanone **6a**

A solution of 2'-aminoacetophenone **3** (3 g, 21.75 mmol), *p*-toluenesulfonyl chloride (12 g, 61.77 mmol), pyridine (8 ml, 12.78 mmol) in CH<sub>2</sub>Cl<sub>2</sub> (200 ml) was stirred overnight. The reaction mixture was washed twice with a saturated aqueous solution of CuSO<sub>4</sub> (2 x 150 ml) and once with water (150 ml). The organic layer was dried and concentrated *in vacuo* and the resulting residue was purified by crystallization from ethyl acetate to yield sulfonamide **6a** (6.034 g, 96%) as white needles, mp 148-150°C (EtOAc) (lit.<sup>1</sup> 147-148°C); <sup>1</sup>H NMR (CDCl<sub>3</sub>, 250 MHz) δ 2.36 (3H, s), 2.56 (3H, s), 7.06 (1H, td, *J* = 1.19, 7.72), 7.22 (2H, d, *J* = 7.93), 7.45 (1H, td, *J* = 1.19, 7.72), 7.68 (1H, dd, *J* = 1.19, 7.93), 7.74 (2H, d, *J* = 8.32), 7.79 (1H, dd, *J* = 1.19, 7.93), 11.46 (1H, s); <sup>13</sup>C NMR (CDCl<sub>3</sub>, 63 MHz) δ 21.4, 28.0, 118.8, 122.1, 122.5, 127.5, 129.5, 131.8, 134.8, 136.4, 139.9, 143.8, 202.4; FTIR (neat film, cm<sup>-1</sup>) 3052.9, 1644.2; EIMS (*m/z*, %) 289 (M, 89), 155 (19), 134 (96), 120 (15), 106 (23), 91 (100); HRMS calcd for C<sub>15</sub>H<sub>15</sub>NO<sub>3</sub>S, 289.0773; found, 289.0767.

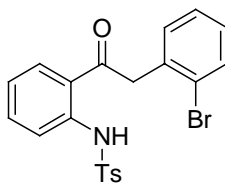

### 2-(2-Bromophenyl)-1-[2-*N*-(4-methylbenzenesulfonamido)phenyl]ethanone **7a**.

A solution of sulfonamide **6a** (150 mg, 0.519 mmol), 1,2-dibromobenzene **4** (0.15 ml, 1.25 mmol), Pd(OAc)<sub>2</sub> (5.3 mg, 0.023 mmol), Xantphos (26.5 mg, 0.044 mmol), Cs<sub>2</sub>CO<sub>3</sub> (243.6 mg, 0.74 mmol), toluene (2.6 ml) and water (0.5 ml) was heated at

<sup>1</sup> Kempter, G.; Schiewald, E. *J. Prakt. Chem.* **1965**, 28, 169.

120°C. After 48 hours the reaction mixture was partitioned between water and dichloromethane. The organic layer was dried and concentrated *in vacuo*. The crude product was then purified by flash chromatography (CH<sub>2</sub>Cl<sub>2</sub>) to give starting material **6a** (22.1 mg) and deoxybenzoin **7a** (167,8 mg, 86%) as translucent prisms, mp 125-126°C (EtOAc); <sup>1</sup>H NMR (CDCl<sub>3</sub>, 250 MHz) δ 2.36 (3H, s), 4.40 (2H, s), 7.07-7.34 (6H, m), 7.48 (1H, td, *J* = 1.19, 7.93), 7.60 (1H, dd, *J* = 1.19, 7.93), 7.72 (2H, d, *J* = 8.32), 7.76 (1H, dd, *J* = 1.19, 8.72), 7.97 (1H, dd, *J* = 1.19, 7.93), 11.32 (1H, s); <sup>13</sup>C NMR (CDCl<sub>3</sub>, 63 MHz) δ 21.4, 46.6, 119.1, 121.6, 122.7, 124.9, 127.1, 127.5, 129.0, 129.6, 131.1, 131.7, 132.7, 134.3, 135.0, 136.4, 140.2, 143.8, 200.4; FTIR (neat film, cm<sup>-1</sup>) 3122.2, 1651.6; FAB-MS (*m/z*, %) 446 (MH+2, 75), 444 (MH, 78), 391 (80), 307 (25), 289 (23), 274 (95), 248 (31), 154 (100); HRMS calcd for C<sub>21</sub>H<sub>18</sub>O<sub>3</sub>SBr, 443.0191; found, 443.0181.

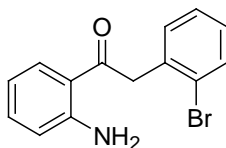

#### 1-(2-Aminophenyl)-2-(2-bromophenyl)ethanone **5**

A solution of deoxybenzoin **7a** (1.1892 g, 2.678 mmol) in 20 ml of concentrated sulfuric acid was stirred at room temperature in an open vessel for 10 min (until complete solution of the substrate is visually observed). The reaction mixture was then poured onto an ice-water mixture (aprox. 200 ml). The resulting solution was allowed to reach room temperature and then was extracted with diethyl ether (3 x 150 ml). The organic layer was dried and the solvent was removed *in vacuo* to give amine **5** (736 mg, 95%) as pale yellow crystals, mp 84-86°C (Et<sub>2</sub>O); <sup>1</sup>H NMR (CDCl<sub>3</sub>, 250 MHz) δ 4.46 (2H, s), 6.16 (2H, bs), 6.69-6.75 (2H, m), 7.14-7.34 (4H, m), 7.62 (1H, d, *J* = 7.53), 7.88 (1H, d, *J* = 7.92); <sup>13</sup>C NMR (CDCl<sub>3</sub>, 63 MHz) δ 46.2, 115.9, 117.4, 125.2, 127.4,

128.6, 131.0, 131.7, 132.7, 134.5, 135.6, 150.5, 198.4; FTIR (neat film,  $\text{cm}^{-1}$ ) 3473.9, 3348.3, 1650.0; EIMS ( $m/z$ , %) 291 ( $M+2$ , 10), 289 ( $M$ , 9), 120 (100), 92 (15); HRMS calcd for  $\text{C}_{14}\text{H}_{12}\text{NOBr}$ , 291.0082; found, 291.0097.

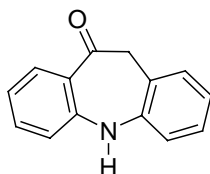

**10,11-Dihydro-5H-dibenz[b,f]azepin-10-one 8**

A solution of amine **5** (100.6 mg, 0.347 mmol),  $\text{Pd}(\text{OAc})_2$  (4 mg, 0.017 mmol), BINAP (17.4 mg, 0.027 mmol), previously ground  $\text{K}_3\text{PO}_4$  (150 mg, 0.683 mmol), toluene (3.5 ml) and water (1.5 ml) was heated at  $130^\circ\text{C}$ . After 5 hours the reaction mixture was partitioned between water and dichloromethane. The organic layer was dried and concentrated *in vacuo*. The crude product was then purified by flash chromatography (5%  $\text{Et}_2\text{O}/\text{CH}_2\text{Cl}_2$ ) to give azepinone **8** (66 mg, 91%) as yellow needles, mp  $138\text{--}139^\circ\text{C}$  (MeOH);  $^1\text{H}$  NMR ( $\text{CDCl}_3$ , 250 MHz)  $\delta$  3.84 (2H, s), 6.84 (1H, bs), 6.93 (1H, t,  $J = 7.53$ ), 7.03–7.31 (5H, m), 7.41 (1H, td,  $J = 1.58, 7.53$ ), 8.04 (1H, dd,  $J = 1.59, 8.33$ );  $^{13}\text{C}$  NMR ( $\text{CDCl}_3$ , 63 MHz)  $\delta$  49.3, 118.8, 119.2, 119.4, 123.9, 124.3, 124.8, 127.6, 129.9, 130.5, 133.5, 141.3, 146.4, 189.6; FTIR (neat film,  $\text{cm}^{-1}$ ) 3325.7, 3229.4, 3136.1, 3054.2, 2973.1, 1649.9; EIMS ( $m/z$ , %) 209 ( $M$ , 100), 180 (58), 120 (17); HRMS calcd for  $\text{C}_{14}\text{H}_{11}\text{NO}$ , 209.0841; found, 209.0847.

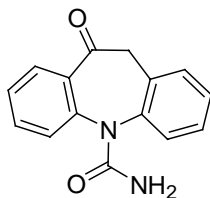

**10,11-Dihydro-5-aminocarbonyl-dibenz[b,f]azepin-10-one (oxcarbazepine) 1**

The patented procedure<sup>2</sup> for the carbamoylation of derivative **8** (66 mg, 0.316 mmol) was slightly modified, altering the amount of the chlorosulfonyl isocyanate reagent (3.6 eq.). The use of water instead of ice and the purification method (flash chromatography, 8% MeOH/CH<sub>2</sub>Cl<sub>2</sub>) were also slight modifications of the latter procedure. Thus, oxcarbazepine **1** (39.8 mg, 50%) was isolated as a white solid, mp 219-221°C (MeOH), (lit.<sup>2</sup> 224°C (MeOH)); <sup>1</sup>H NMR (CDCl<sub>3</sub>, 250 MHz) δ 3.85 (1H, d, *J* = 13.87), 4.45 (1H, d, *J* = 13.87), 4.97 (2H, bs), 7.31-7.68 (7H, m), 8.10 (1H, dd, *J* = 1.59, 7.93); <sup>13</sup>C NMR (CDCl<sub>3</sub>, 63 MHz) δ 48.9, 127.3, 127.7, 128.6, 129.0, 129.3, 129.8, 130.1, 130.6, 133.9, 141.2, 143.0, 156.1, 157.3, 191.9; FTIR (neat film, cm<sup>-1</sup>) 3459.8, 3330.6, 1678.1, 1648.7; EIMS (*m/z*, %) 252 (M, 47), 209 (86), 180 (100), 152 (23). HRMS calcd for C<sub>15</sub>H<sub>12</sub>N<sub>2</sub>O<sub>2</sub>, 252.0899; found, 252.0896.

---

<sup>2</sup> Milanese, A. PCT Int. Appl. WO 9621649, 1996; *Chem. Abstr.* **1996**, 125, 195448.

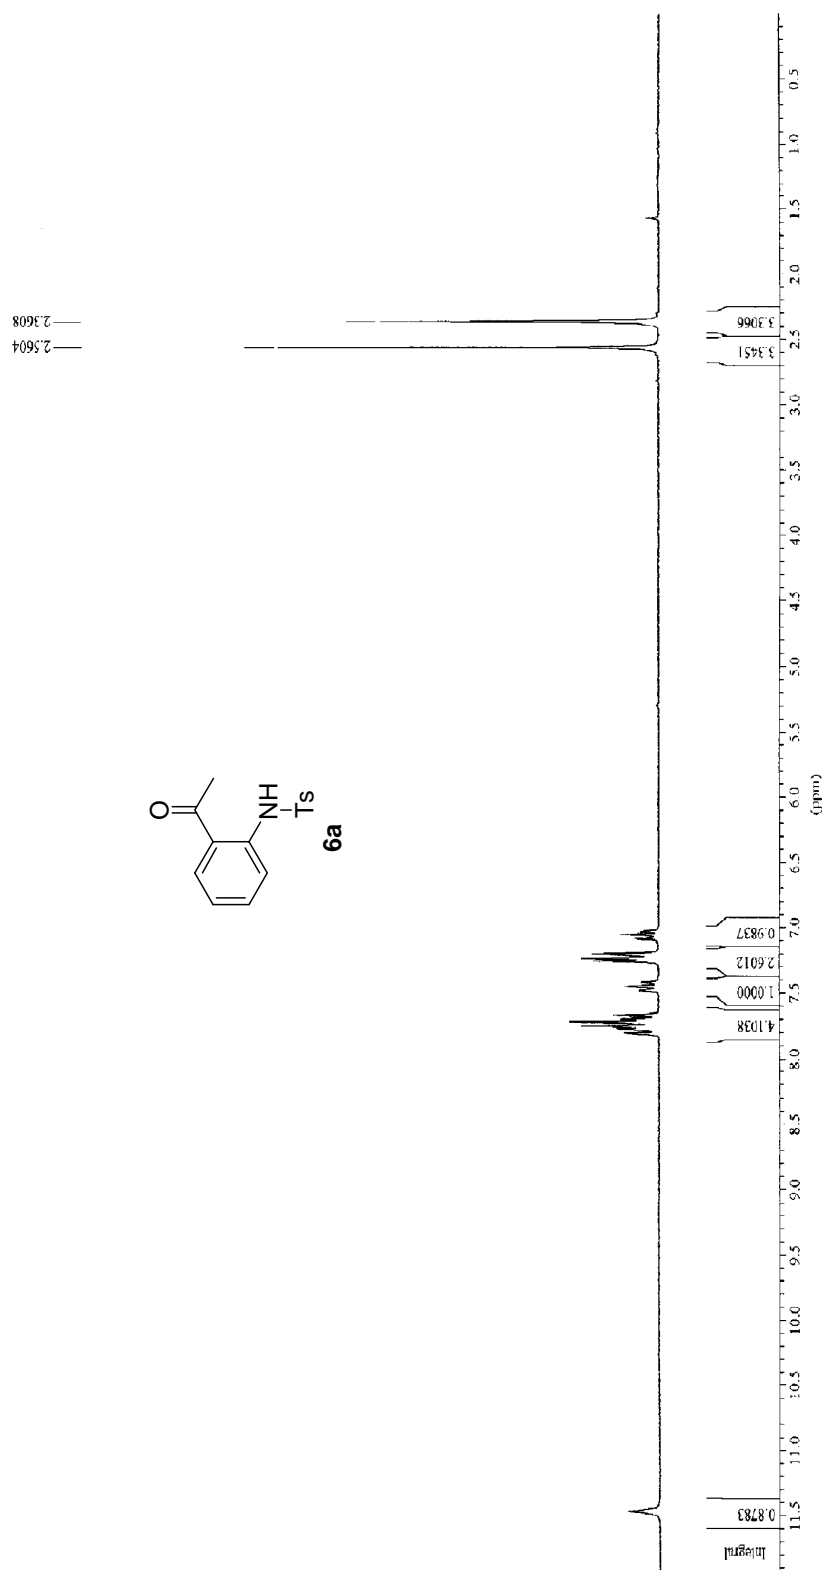

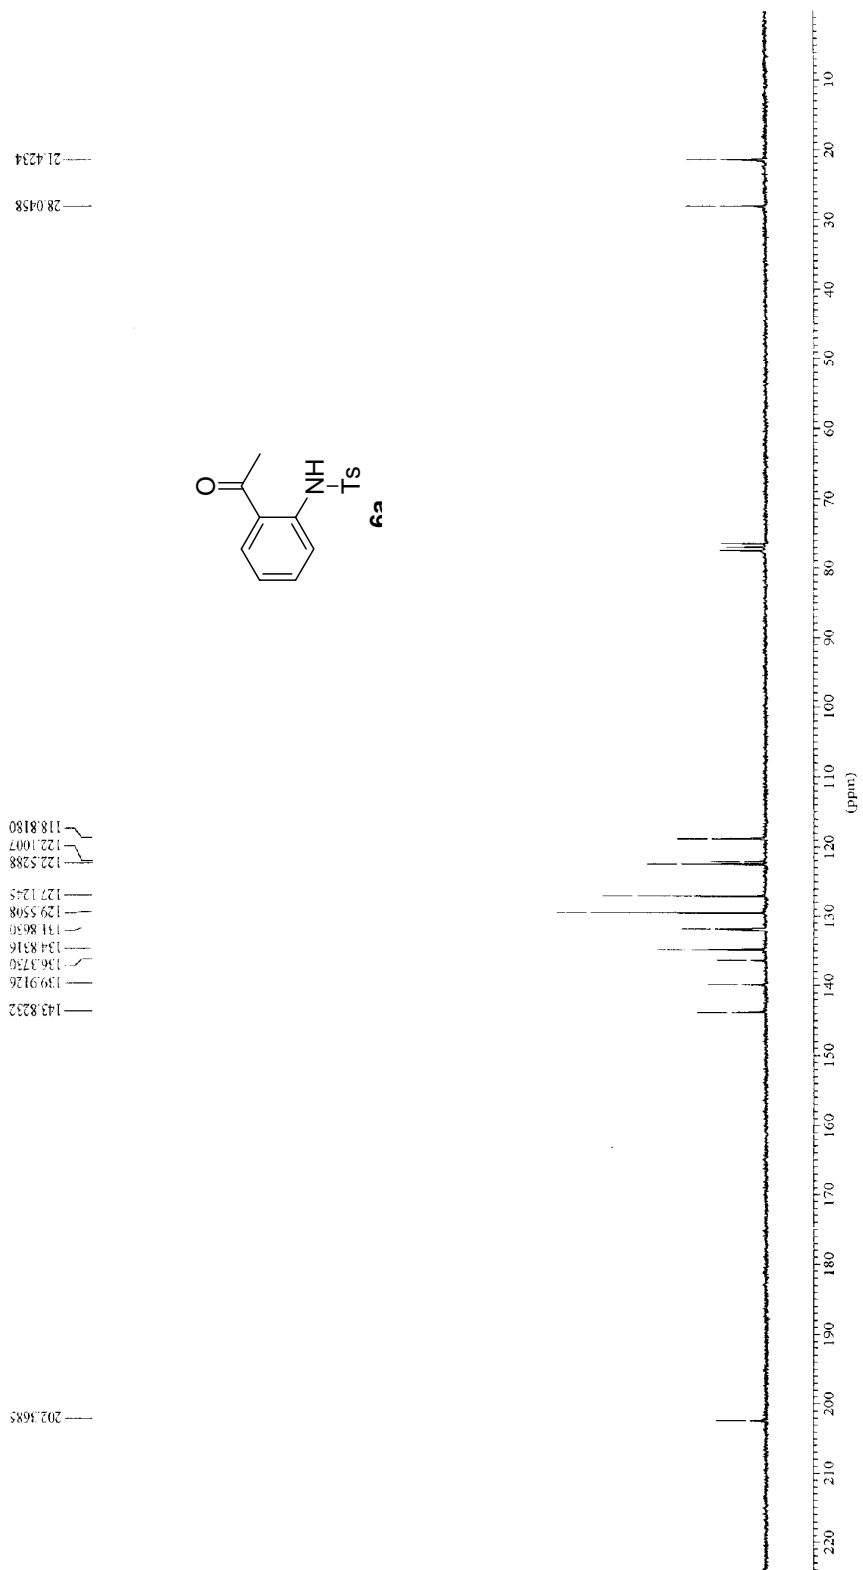



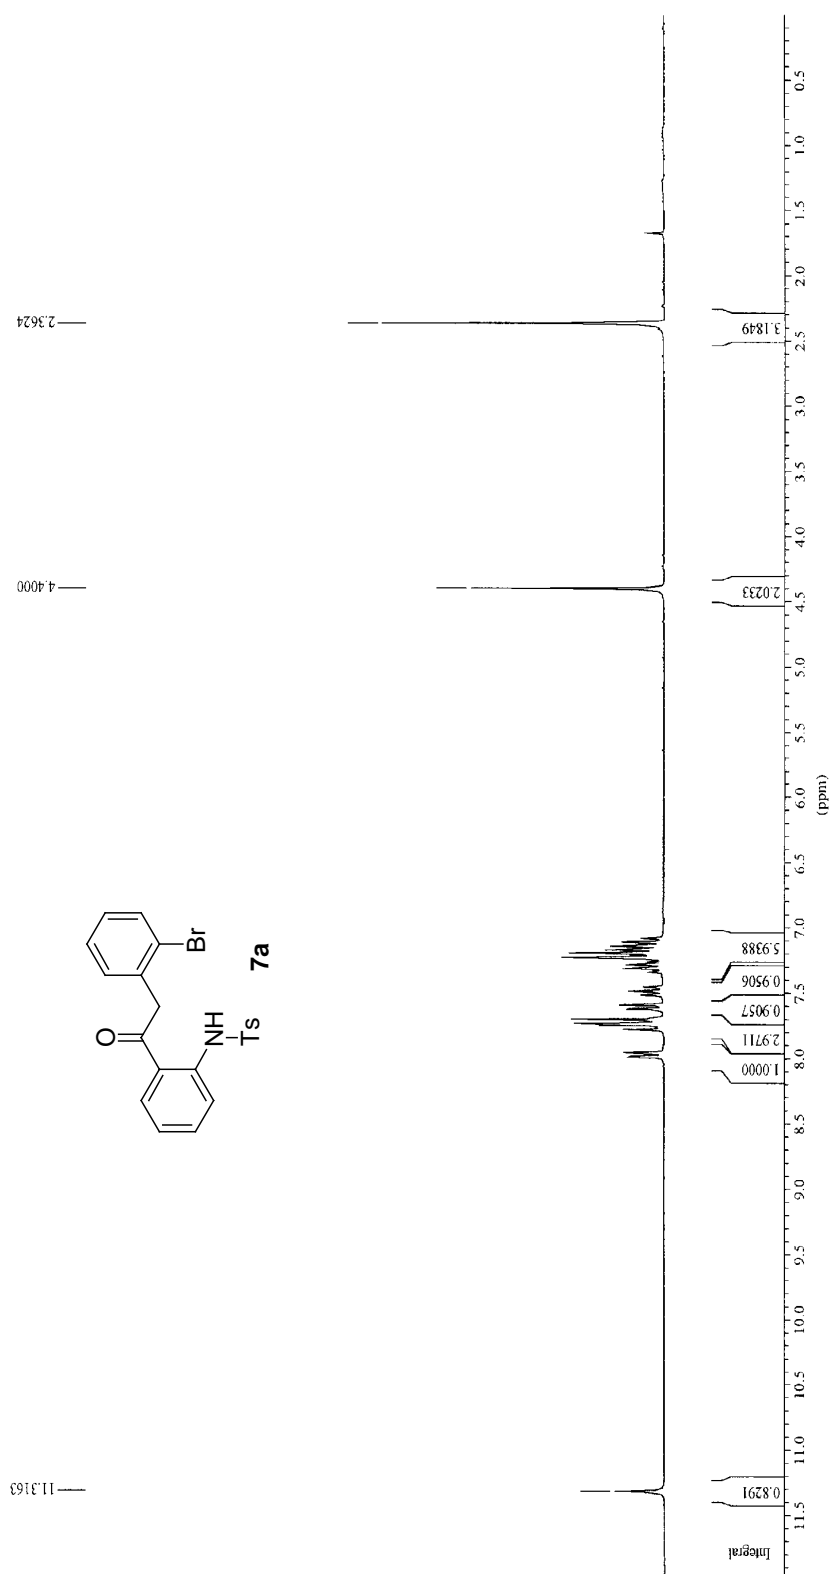

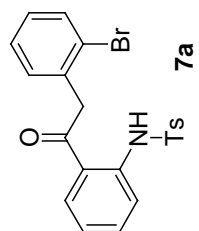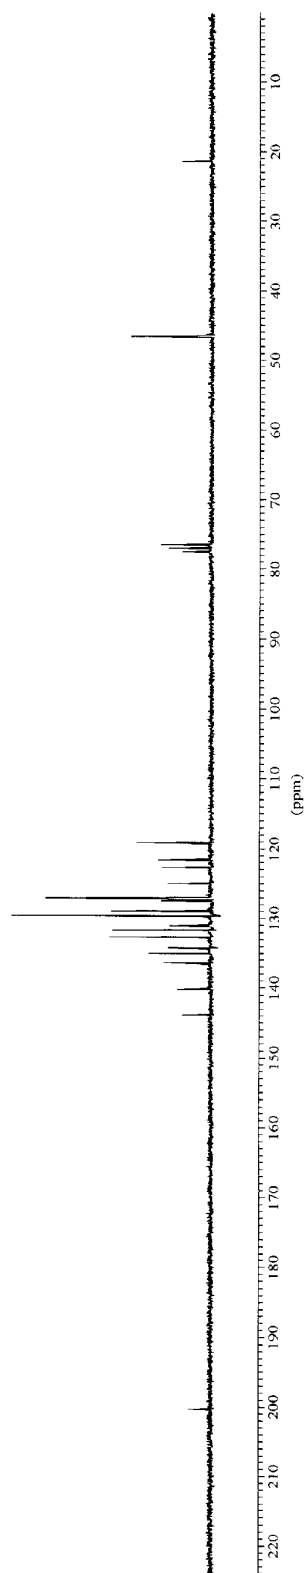

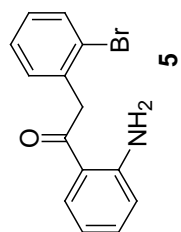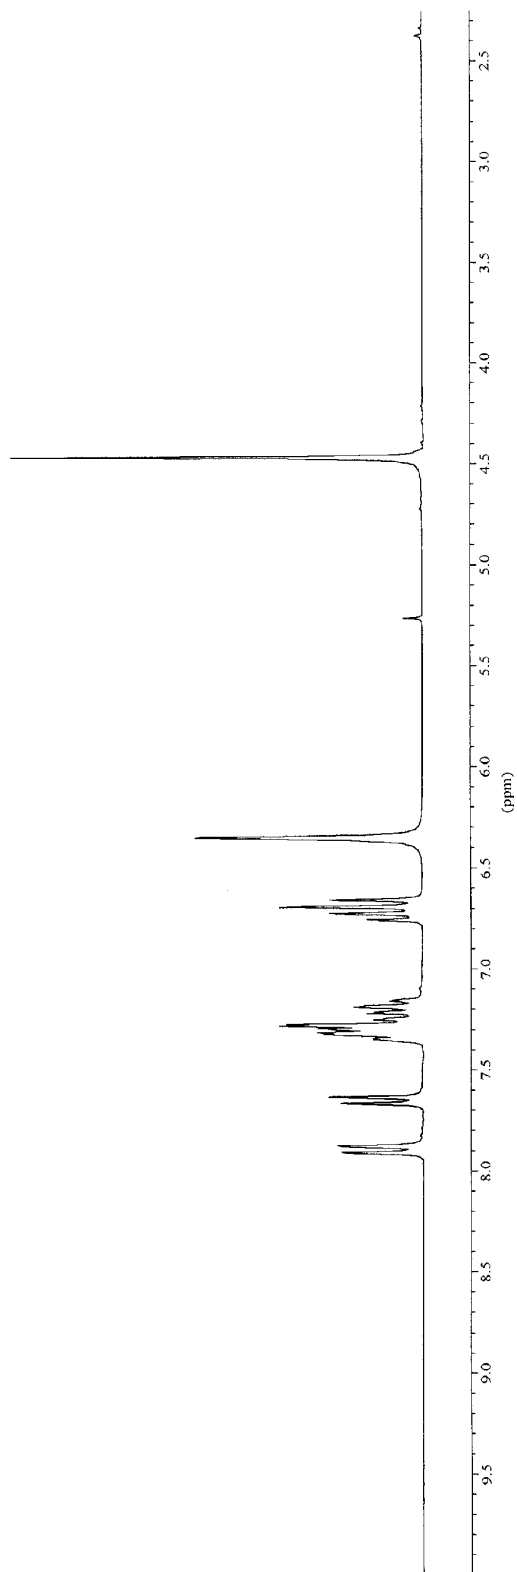

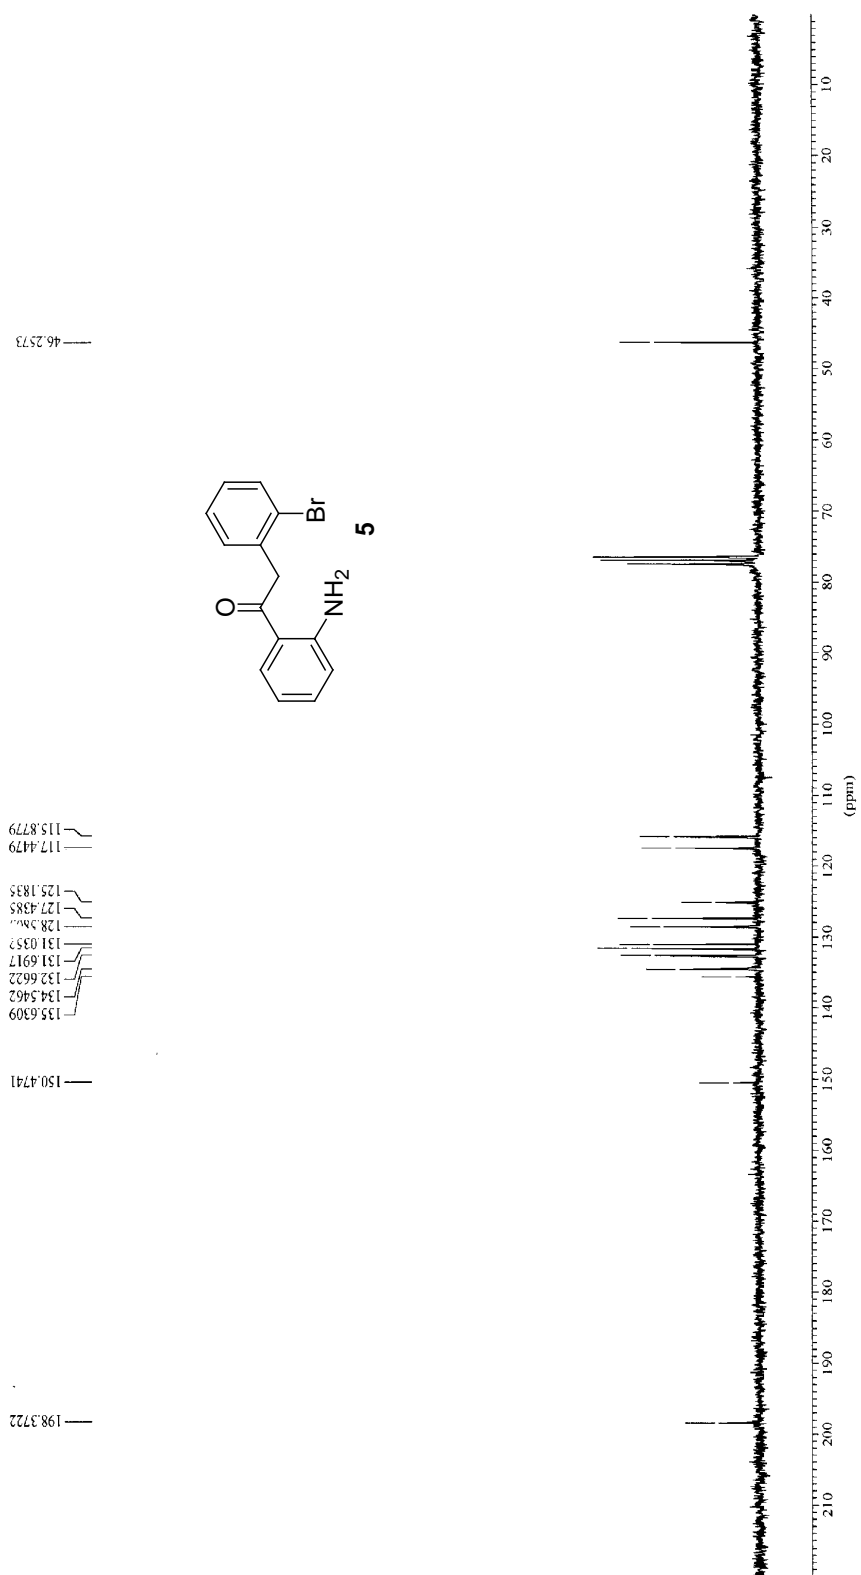

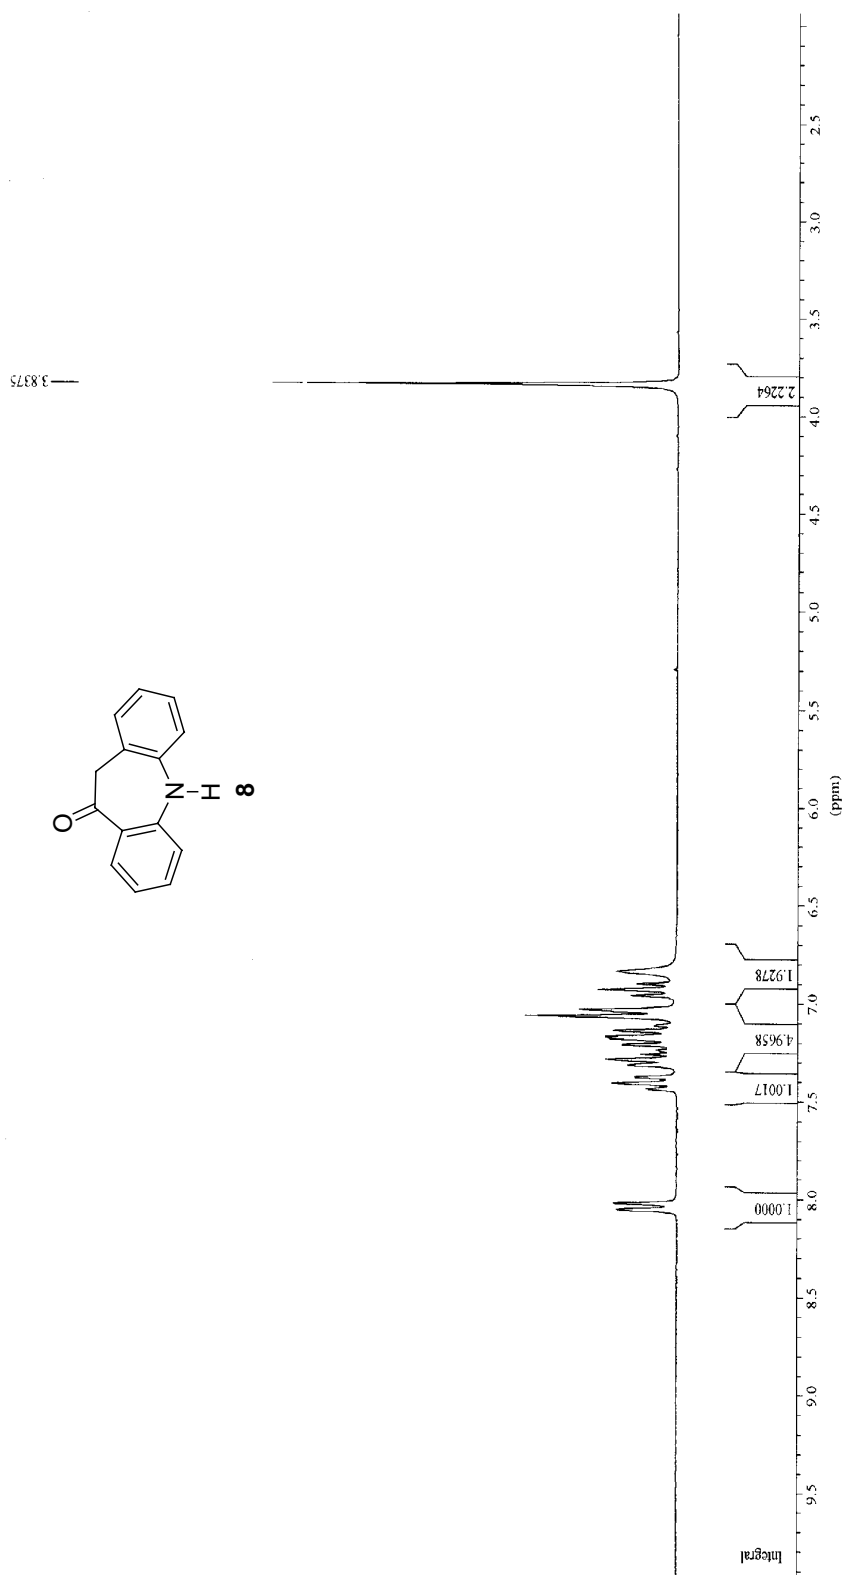

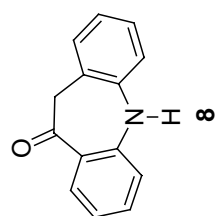

49.2831

118.8466  
119.3604  
119.1606  
123.9561  
124.3272  
124.8410  
127.5813  
129.9219  
130.4643  
133.5186  
141.3398  
146.4208

189.5519

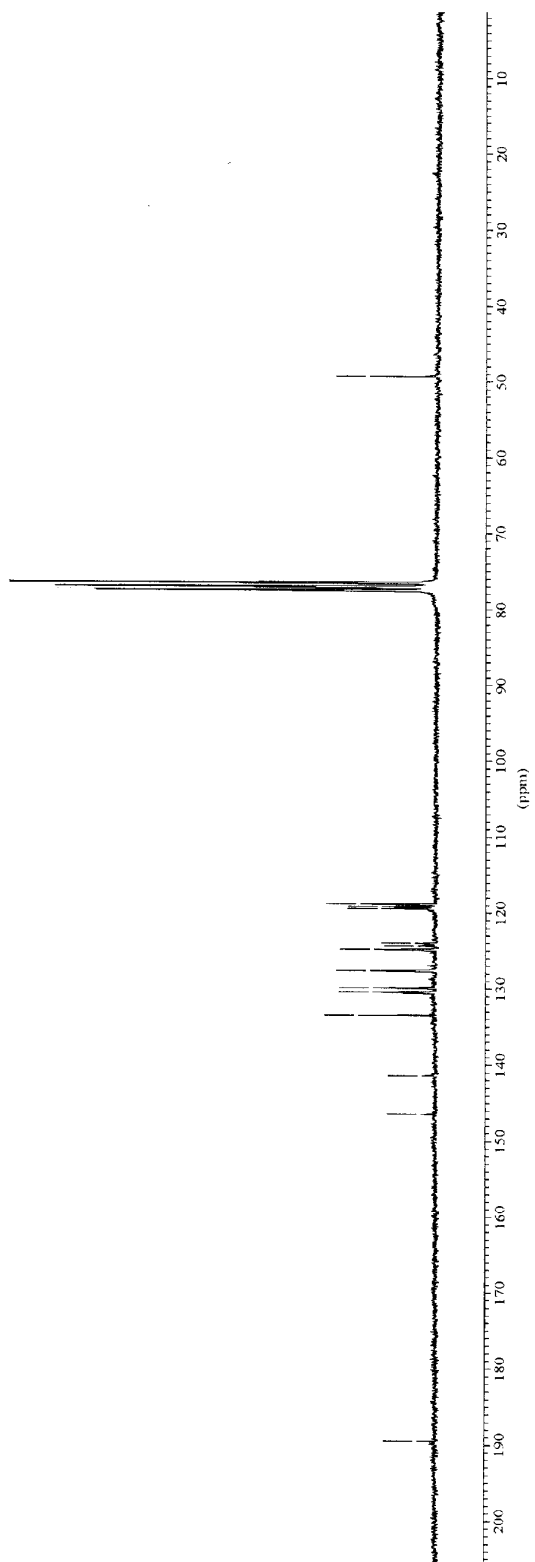

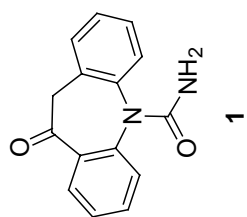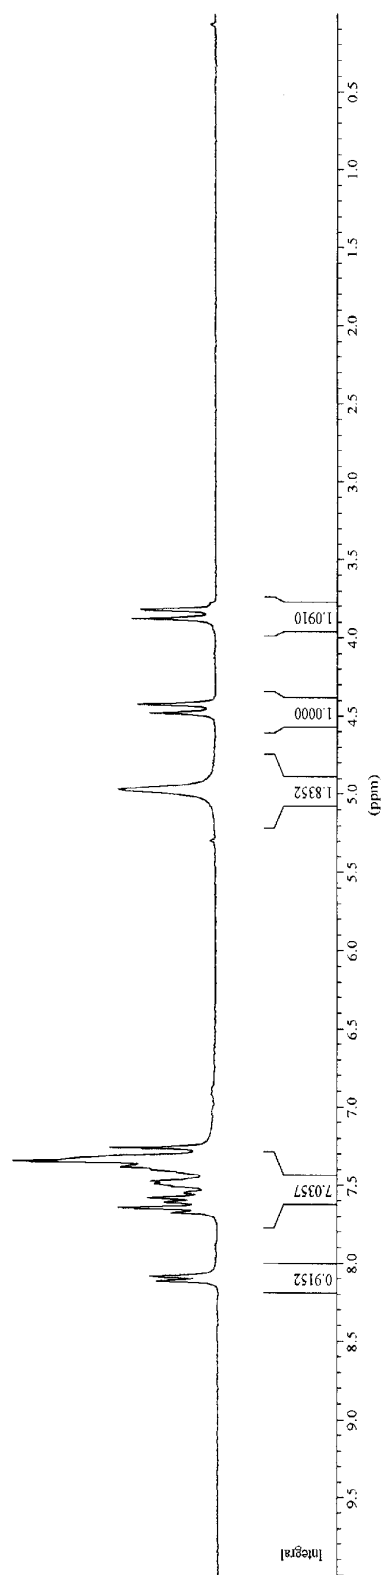

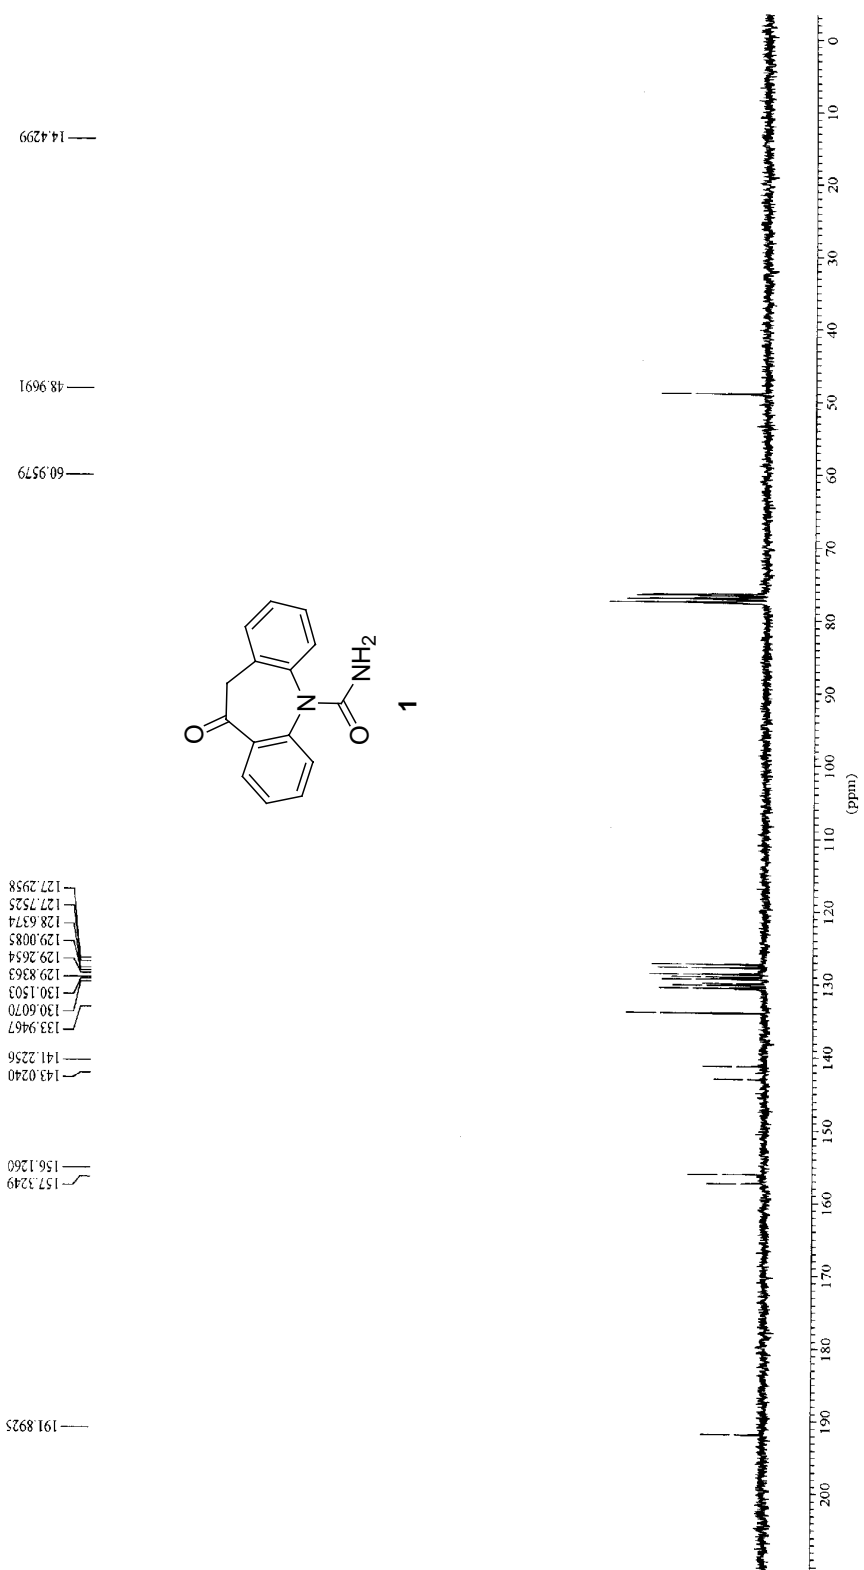

Supplement: Supplementary file 1 [file 5098510]
